# Supplementary material
Source: PubMed Central journal article supplement (PMC6702604)
Supplement: DC182254SupplementaryData.pdf [file DC182254SupplementaryData.pdf]

SUPPLEMENTARY DATA

**\*eTable S1.** Geometric means (GMs) and inter-quartile range (IQR) of plasma perfluoroalkyl and polyfluoroalkyl substances (PFASs) concentration measured at baseline and 2-years post-randomization and spearman correlations ( $r_s$ ) between baseline and year-2 concentrations in the Diabetes Prevention Program (DPP); N=957.

| PFAS biomarkers | Chemical Name                                    | Baseline    |                | Year-2      |                | Spearman correlation |
|-----------------|--------------------------------------------------|-------------|----------------|-------------|----------------|----------------------|
|                 |                                                  | <LOD n (%)  | GM (IQR) ng/mL | <LOD n (%)  | GM (IQR) ng/mL | $r_s$                |
| <b>Sum PFAS</b> | Sum PFASs                                        | 0           | 38.43 (28.60)  | 0           | 41.12 (27.1)   | 0.92                 |
| <b>PFOS</b>     | Perfluorooctane sulfonic acid                    | 0           | 26.38 (22.80)  | 0           | 28.13 (19.2)   | 0.69                 |
| <b>n-PFOS</b>   | Linear perfluorooctane sulfonic acid             | 0           | 18.42 (16.9)   | 0           | 20.39 (14.6)   | 0.67                 |
| <b>Sm-PFOS</b>  | Perfluoromethylheptane sulfonic acids            | 0           | 7.32 (6.50)    | 0           | 7.35 (5.6)     | 0.60                 |
| <b>Sm2-PFOS</b> | Perfluorodimethylhexane sulfonic acids           | 564 (58.9%) | 0.13 (0.23)    | 557 (58.2%) | 0.13 (0.23)    | 0.33                 |
| <b>PFOA</b>     | Perfluorooctanoic acid                           | 0           | 4.82 (3.20)    | 0           | 5.77 (4.0)     | 0.68                 |
| <b>n-PFOA</b>   | Linear perfluorooctanoic acid                    | 0           | 4.29 (2.90)    | 0           | 4.85 (3.0)     | 0.74                 |
| <b>Sb-PFOA</b>  | Branched perfluorooctanoic acids                 | 159 (16.6%) | 0.44 (0.50)    | 101 (10.6%) | 0.61 (0.8)     | 0.49                 |
| <b>PFHxS</b>    | Perfluorohexane sulfonic acid                    | 1 (0.1%)    | 2.41 (2.40)    | 9 (0.9%)    | 2.42 (2.4)     | 0.82                 |
| <b>EtFOSAA</b>  | N-ethyl-perfluorooctane sulfonamido acetic acid  | 32 (3.3%)   | 1.13 (1.50)    | 76 (7.9%)   | 0.94 (1.3)     | 0.48                 |
| <b>MeFOSAA</b>  | N-methyl-perfluorooctane sulfonamido acetic acid | 29 (2.6%)   | 0.94 (1.10)    | 32 (3.3%)   | 1.03 (1.0)     | 0.41                 |
| <b>PFNA</b>     | Perfluorononanoic acid                           | 65 (6.8%)   | 0.53 (0.40)    | 46 (4.8%)   | 0.58 (0.5)     | 0.78                 |

LOD = Limit of Detection; LOD was 0.1 ng/mL for all analytes

IQR = Inter-Quartile Range

PFOS = n-PFOS + Sm-PFOS + Sm2-PFOS

PFOA = n-PFOA + Sb-PFOA

\*Partial data from this table has been previously published in: Cardenas, Andres, *et al.* "Plasma concentrations of per-and polyfluoroalkyl substances at baseline and associations with glycemic indicators and diabetes incidence among high-risk adults in the Diabetes Prevention Program trial." *Environmental health perspectives* 125.10 (2017): 107001.

SUPPLEMENTARY DATA

**eTable S2.** <sup>a</sup> Adjusted hazard ratios (HRs) and 95% confidence intervals (95% CI) for diabetes incidence during follow-up relative to baseline plasma PFAS concentration categorized in tertiles overall and stratified by baseline treatment.

| PFAS            | Overall N=956<br>(507 cases) |      | Placebo N=476<br>(272 cases) |              | Lifestyle N=480<br>(235 cases) |      |
|-----------------|------------------------------|------|------------------------------|--------------|--------------------------------|------|
|                 | HR (95% CI)                  | P    | HR (95% CI)                  | P            | HR (95% CI)                    | P    |
| <b>Sum PFAS</b> |                              |      |                              |              |                                |      |
| Tertile 1       | <i>Ref</i>                   | 0.59 | <i>Ref</i>                   | 0.74         | <i>Ref</i>                     | 0.93 |
| Tertile 2       | 0.97 (0.77, 1.22)            |      | 0.94 (0.69, 1.30)            |              | 1.00 (0.71, 1.41)              |      |
| Tertile 3       | 0.94 (0.75, 1.18)            |      | 0.95 (0.69, 1.30)            |              | 0.99 (0.70, 1.39)              |      |
| <b>PFOS</b>     |                              |      |                              |              |                                |      |
| Tertile 1       | <i>Ref</i>                   | 0.30 | <i>Ref</i>                   | 0.47         | <i>Ref</i>                     | 0.54 |
| Tertile 2       | 0.96 (0.77, 1.20)            |      | 0.83 (0.61, 1.13)            |              | 1.17 (0.83, 1.64)              |      |
| Tertile 3       | 0.89 (0.71, 1.11)            |      | 0.90 (0.66, 1.22)            |              | 0.92 (0.64, 1.29)              |      |
| <b>n-PFOS</b>   |                              |      |                              |              |                                |      |
| Tertile 1       | <i>Ref</i>                   | 0.27 | <i>Ref</i>                   | 0.69         | <i>Ref</i>                     | 0.60 |
| Tertile 2       | 1.00 (0.80, 1.26)            |      | 0.85 (0.63, 1.16)            |              | 1.25 (0.89, 1.78)              |      |
| Tertile 3       | 1.09 (0.73, 1.15)            |      | 0.94 (0.69, 1.29)            |              | 0.94 (0.66, 1.33)              |      |
| <b>Sm-PFOS</b>  |                              |      |                              |              |                                |      |
| Tertile 1       | <i>Ref</i>                   | 0.27 | <i>Ref</i>                   | 0.75         | <i>Ref</i>                     | 0.26 |
| Tertile 2       | 0.94 (0.75, 1.18)            |      | 1.04 (0.76, 1.42)            |              | 0.88 (0.63, 1.22)              |      |
| Tertile 3       | 0.88 (0.71, 1.10)            |      | 0.95 (0.70, 1.29)            |              | 0.83 (0.59, 1.15)              |      |
| <b>Sm2-PFOS</b> |                              |      |                              |              |                                |      |
| <Median         | <i>Ref</i>                   | 0.85 | <i>Ref</i>                   | 0.37         | <i>Ref</i>                     | 0.36 |
| ≥Median         | 1.02 (0.85, 1.22)            |      | 1.12 (0.87, 1.45)            |              | 0.88 (0.67, 1.16)              |      |
| <b>PFOA</b>     |                              |      |                              |              |                                |      |
| Tertile 1       | <i>Ref</i>                   | 0.62 | <i>Ref</i>                   | 0.72         | <i>Ref</i>                     | 0.37 |
| Tertile 2       | 0.94 (0.75, 1.17)            |      | 0.93 (0.68, 1.27)            |              | 0.88 (0.63, 1.23)              |      |
| Tertile 3       | 0.94 (0.75, 1.18)            |      | 1.06 (0.77, 1.47)            |              | 0.86 (0.61, 1.20)              |      |
| <b>Sb-PFOA</b>  |                              |      |                              |              |                                |      |
| Tertile 1       | <i>Ref</i>                   | 0.13 | <i>Ref</i>                   | <b>0.002</b> | <i>Ref</i>                     | 0.36 |
| Tertile 2       | 1.12 (0.90, 1.40)            |      | <b>1.53 (1.12, 2.10)</b>     |              | 0.69 (0.49, 1.10)              |      |
| Tertile 3       | 1.18 (0.95, 1.46)            |      | <b>1.61 (1.18, 2.19)</b>     |              | 0.88 (0.64, 1.21)              |      |
| <b>PFHxS</b>    |                              |      |                              |              |                                |      |
| Tertile 1       | <i>Ref</i>                   | 0.07 | <i>Ref</i>                   | 0.07         | <i>Ref</i>                     | 0.91 |
| Tertile 2       | 0.80 (0.64, 1.02)            |      | 0.78 (0.58, 1.06)            |              | 0.69 (0.47, 1.00)              |      |
| Tertile 3       | 0.81 (0.64, 1.01)            |      | 0.75 (0.54, 1.04)            |              | 0.95 (0.66, 1.35)              |      |
| <b>EtFOSAA</b>  |                              |      |                              |              |                                |      |
| Tertile 1       | <i>Ref</i>                   | 0.84 | <i>Ref</i>                   | 0.93         | <i>Ref</i>                     | 0.67 |
| Tertile 2       | 1.03 (0.83, 1.29)            |      | 0.96 (0.70, 1.32)            |              | 1.13 (0.79, 1.60)              |      |
| Tertile 3       | 1.02 (0.82, 1.28)            |      | 0.99 (0.72, 1.35)            |              | 1.08 (0.77, 1.55)              |      |
| <b>MeFOSAA</b>  |                              |      |                              |              |                                |      |
| Tertile 1       | <i>Ref</i>                   | 0.65 | <i>Ref</i>                   | 0.91         | <i>Ref</i>                     | 0.61 |
| Tertile 2       | 1.03 (0.82, 1.29)            |      | 1.06 (0.77, 1.45)            |              | 0.96 (0.69, 1.34)              |      |
| Tertile 3       | 0.95 (0.75, 1.19)            |      | 0.98 (0.71, 1.36)            |              | 0.91 (0.65, 1.29)              |      |
| <b>PFNA</b>     |                              |      |                              |              |                                |      |

SUPPLEMENTARY DATA

| Tertile 1 | <i>Ref</i>        |      | <i>Ref</i>        |      | <i>Ref</i>        |      |
|-----------|-------------------|------|-------------------|------|-------------------|------|
| Tertile 2 | 0.96 (0.77, 1.21) | 0.68 | 1.07 (0.78, 1.48) | 0.48 | 0.86 (0.61, 1.20) | 0.98 |
| Tertile 3 | 1.06 (0.83, 1.34) |      | 1.13 (0.81, 1.56) |      | 1.02 (0.70, 1.47) |      |

<sup>a</sup> Adjusted for participant sex, race/ethnicity, and baseline age, marital status, education, income, smoking history, BMI, maternal diabetes, paternal diabetes and treatment assignment if not stratified.

SUPPLEMENTARY DATA

**eTable S3.** <sup>a</sup> Adjusted Odds Ratios (ORs) and 95% confidence intervals (95% CIs) for specific microvascular disease prevalence at the end of DPOS by baseline plasma PFAS concentration

|                                     | <b>Nephropathy</b><br>N=871 (n=110 cases) | <b>Neuropathy</b><br>N=713 (n=88 cases) | <b>Retinopathy</b><br>N=801 (n=98 cases) |
|-------------------------------------|-------------------------------------------|-----------------------------------------|------------------------------------------|
| <b>PFAS (log<sub>2</sub>-scale)</b> | OR (95% CI)                               | OR (95% CI)                             | OR (95% CI)                              |
| <b>Sum PFAS</b>                     | 1.13 (0.87, 1.46)                         | 1.10 (0.79, 1.54)                       | 1.12 (0.85, 1.46)                        |
| <b>PFOS</b>                         | 1.12 (0.89, 1.41)                         | 1.03 (0.77, 1.40)                       | 1.10 (0.86, 1.41)                        |
| n-PFOS                              | 1.12 (0.90, 1.41)                         | 0.99 (0.74, 1.32)                       | 1.11 (0.87, 1.41)                        |
| Sm-PFOS                             | 1.06 (0.85, 1.33)                         | 1.13 (0.85, 1.50)                       | 1.09 (0.87, 1.37)                        |
| Sm2-PFOS                            | 1.13 (0.95, 1.34)                         | 1.20 (0.97, 1.48)                       | <b>1.23 (1.03, 1.47)</b>                 |
| <b>PFOA</b>                         | 0.91 (0.69, 1.20)                         | 1.04 (0.75, 1.46)                       | 1.08 (0.82, 1.41)                        |
| n-PFOA                              | 0.91 (0.68, 1.21)                         | 1.05 (0.74, 1.48)                       | 1.05 (0.79, 1.39)                        |
| Sb-PFOA                             | 0.99 (0.86, 1.15)                         | 1.03 (0.87, 1.24)                       | 1.13 (0.97, 1.32)                        |
| <b>PFHxS</b>                        | 0.98 (0.80, 1.20)                         | 1.19 (0.93, 1.51)                       | 1.09 (0.89, 1.33)                        |
| <b>EtFOSAA</b>                      | 1.12 (0.97, 1.29)                         | 1.08 (0.90, 1.30)                       | 1.07 (0.91, 1.26)                        |
| <b>MeFOSAA</b>                      | 1.06 (0.88, 1.29)                         | 1.20 (0.94, 1.53)                       | 0.90 (0.74, 1.10)                        |
| <b>PFNA</b>                         | 1.00 (0.82, 1.22)                         | 1.16 (0.91, 1.50)                       | 1.14 (0.93, 1.42)                        |

<sup>a</sup> Adjusted for participant sex, race/ethnicity, and baseline age, marital status, education, income, smoking history, BMI, maternal diabetes, paternal diabetes and treatment assignment if not stratified.

SUPPLEMENTARY DATA

**eTable S4.** Mean change of plasma perfluoroalkyl and polyfluoroalkyl substances (PFAS) concentrations from baseline to 2-years post-randomization stratified by treatment.

| PFASs           | Placebo                         | Lifestyle                       | <i>p</i>              |
|-----------------|---------------------------------|---------------------------------|-----------------------|
|                 | Mean change (95% CI)<br>(ng/mL) | Mean change (95% CI)<br>(ng/mL) |                       |
| <b>Sum PFAS</b> | -0.95 (-1.86, -0.05)            | -1.14 (-2.11, -0.18)            | 0.78                  |
| <b>PFOS</b>     | 0.49 (-0.98, 1.97)              | 1.38 (-0.13, 2.89)              | 0.41                  |
| n-PFOS          | 0.91 (-0.22, 2.05)              | 1.71 (0.55, 2.88)               | 0.33                  |
| Sm-PFOS         | -0.38 (-0.86, 0.10)             | -0.32 (-0.83, 0.19)             | 0.87                  |
| Sm2-PFOS        | ---                             | ---                             | ---                   |
| <b>PFOA</b>     | 1.54 (1.21, 1.86)               | 0.92 (0.57, 1.26)               | 0.0011                |
| n-PFOA          | 0.57 (0.37, 0.76)               | 0.60 (0.35, 0.86)               | 0.82                  |
| Sb-PFOA         | 0.96 (0.71, 1.22)               | 0.31 (0.14, 0.48)               | 3.56x10 <sup>-5</sup> |
| <b>PFHxS</b>    | -0.06 (-0.22, 0.11)             | -0.13 (-0.32, 0.07)             | 0.61                  |
| <b>EtFOSAA</b>  | -0.28 (-0.49, -0.08)            | -0.08 (-0.34, 0.19)             | 0.24                  |
| <b>MeFOSAA</b>  | 0.16 (0.02, 0.31)               | 0.13 (-0.07, 0.34)              | 0.83                  |
| <b>PFNA</b>     | 0.06 (0.02, 0.09)               | 0.07 (0.03, 0.10)               | 0.72                  |

SUPPLEMENTARY DATA

**eTable S5.** Geometric means (GMs), inter-quartile ranges (IQR) and proportion of samples below the limit of detection (LOD) for plasma Sb-PFOA concentration by treatment assignment at baseline and 2-years post-randomization.

| <b>Sb-PFOA</b> | <b>Baseline</b> |                  |                 | <b>2-years post-randomization</b> |                  |                       |
|----------------|-----------------|------------------|-----------------|-----------------------------------|------------------|-----------------------|
|                | <b>Placebo</b>  | <b>Lifestyle</b> | <b><i>p</i></b> | <b>Placebo</b>                    | <b>Lifestyle</b> | <b><i>p</i></b>       |
| GM (IQR) ng/mL | 0.44 (0.50)     | 0.44 (0.60)      | 0.93            | 0.73 (0.80)                       | 0.52 (0.70)      | 1.65x10 <sup>-5</sup> |
| % below LOD    | 15.76%          | 17.46%           | 0.53            | 8.19%                             | 12.89%           | 0.02                  |

SUPPLEMENTARY DATA

**eFigure S1.** Participant flow diagram selected for analyses of plasma PFAS concentration from the Diabetes Prevention Program Trial

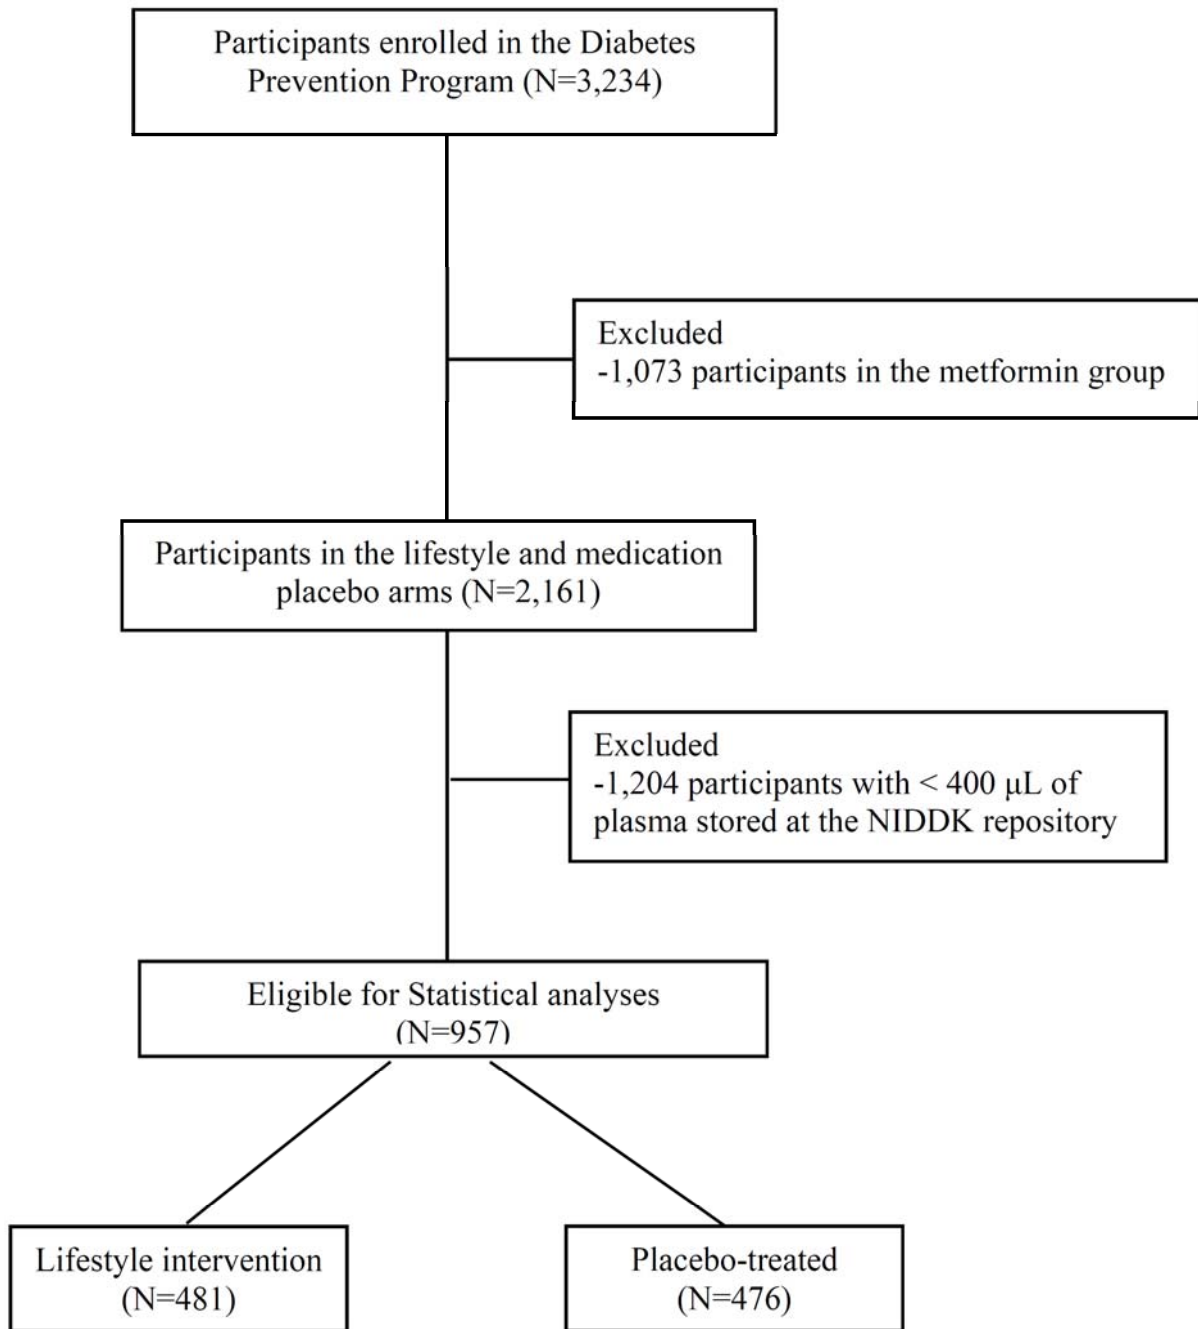

SUPPLEMENTARY DATA

**eFigure S2.** Cumulative incidence of diabetes, excluding participants that developed diabetes (N=204) during DPP, for participants with plasma Sb-PFOA at or below median concentration ( $\leq 0.5$  ng/mL) and among participants with above median Sb-PFOA concentration for **A)** placebo treated group and **B)** lifestyle intervention group.

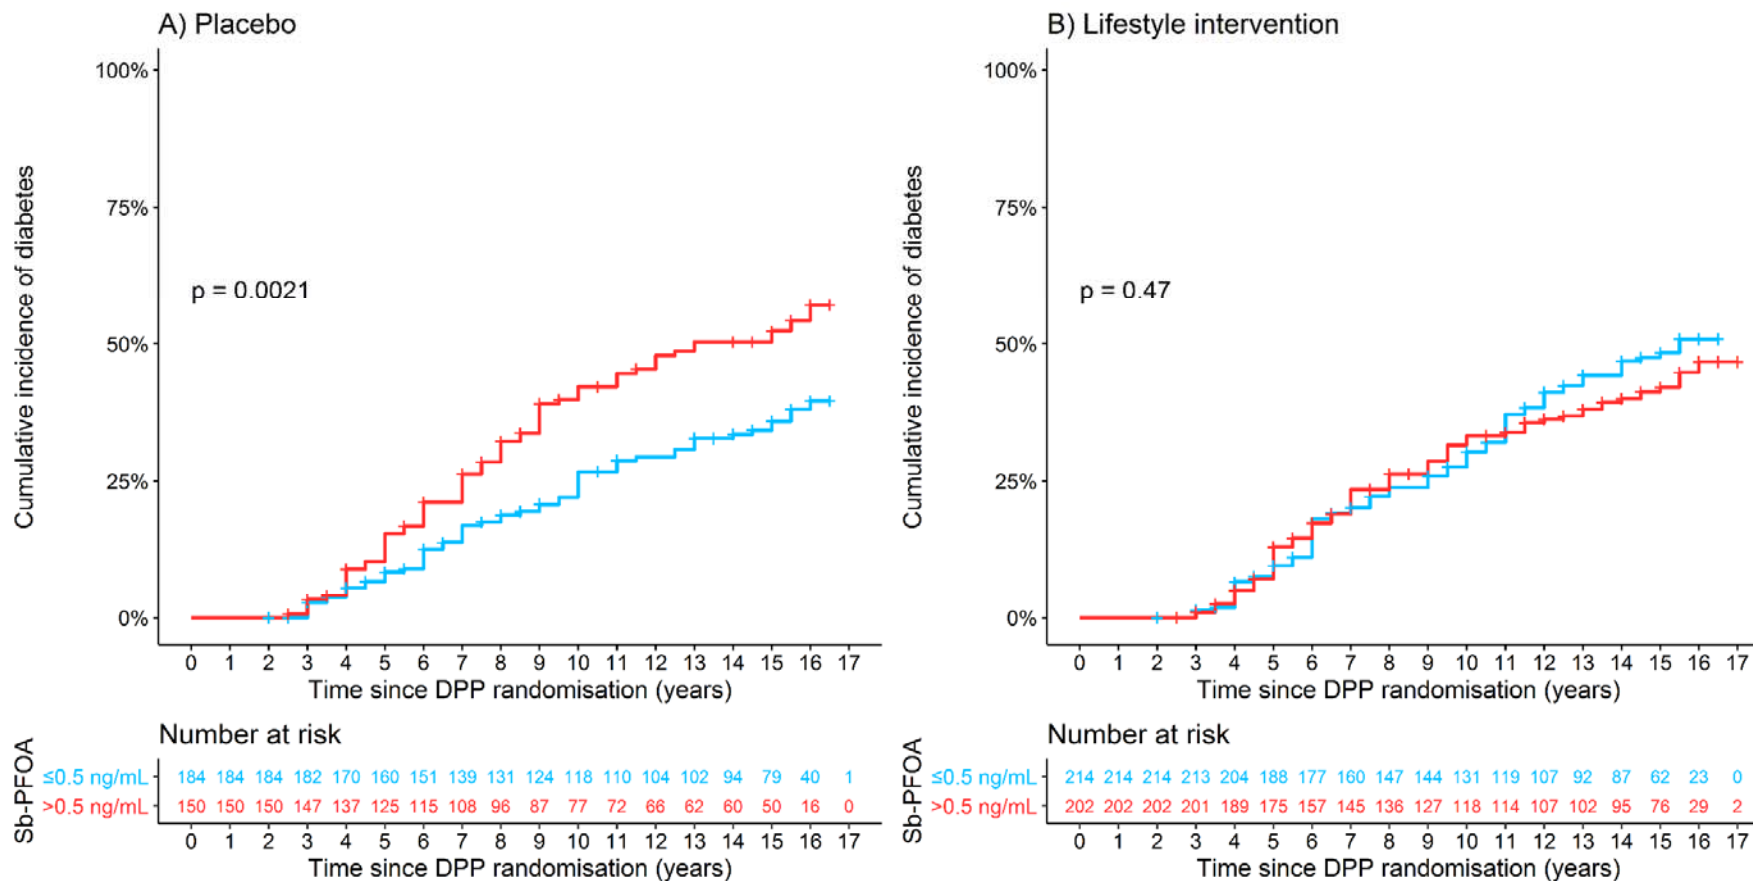



SUPPLEMENTARY DATA

**eFigure S3.** <sup>a</sup> Adjusted estimated change in hemoglobin A<sub>1c</sub> (HbA<sub>1c</sub>) from baseline, stratified by treatment, for the 25<sup>th</sup> and 75<sup>th</sup> percentiles of plasma Sb-PFOA concentration.

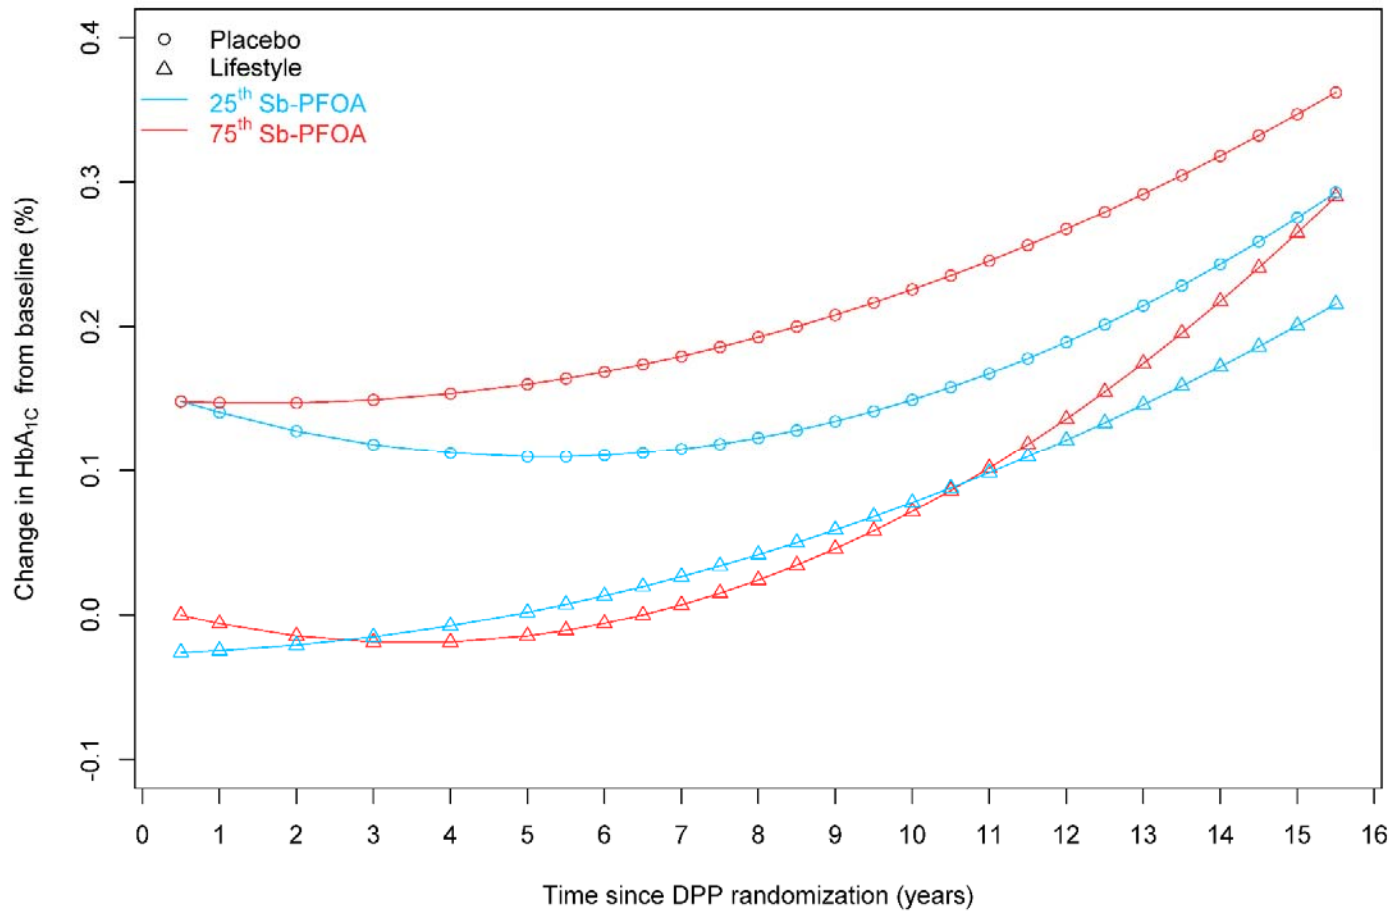

<sup>a</sup> Adjusted for participant sex, race/ethnicity, and baseline age, marital status, education, income, smoking history, BMI, maternal diabetes and paternal diabetes
